# Supplementary material for: The origin of a novel gene through overprinting in Escherichia coli
Source: Springer Nature journal article supplement (doi:10.1186/1471-2148-8-31), 2008-01-01
Supplement: 12862_2007_600_MOESM5_ESM.pdf [file 12862_2007_600_MOESM5_ESM.pdf]

# ORF structure

# Pfam domains

# UniProt AC

# Species

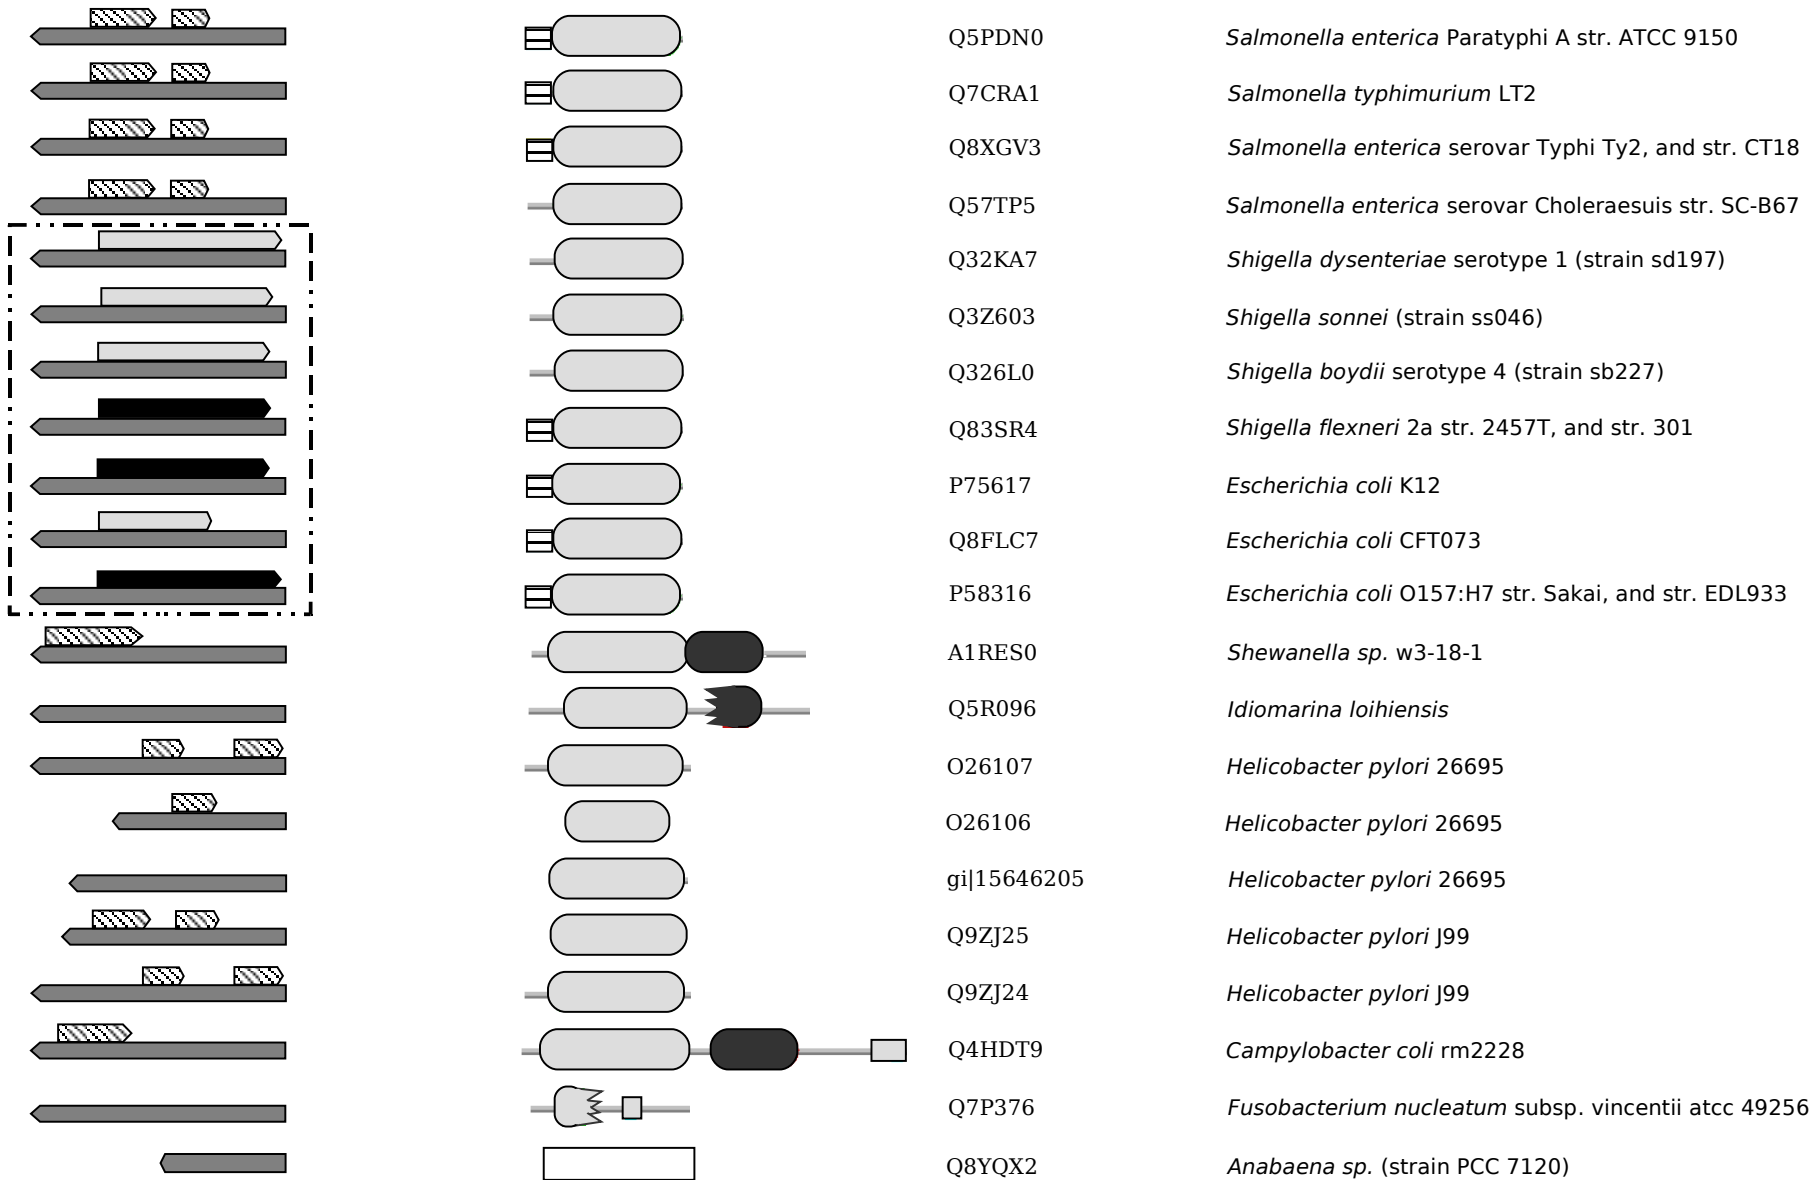

*yaaW*      *htgA*      Predicted *htgA*      ORF

none      UPF0174      GTPase domain
