# Supplementary figures and images for: The origin of a novel gene through overprinting in Escherichia coli
Source: Springer Nature journal article supplement (doi:10.1186/1471-2148-8-31), 2008-01-01

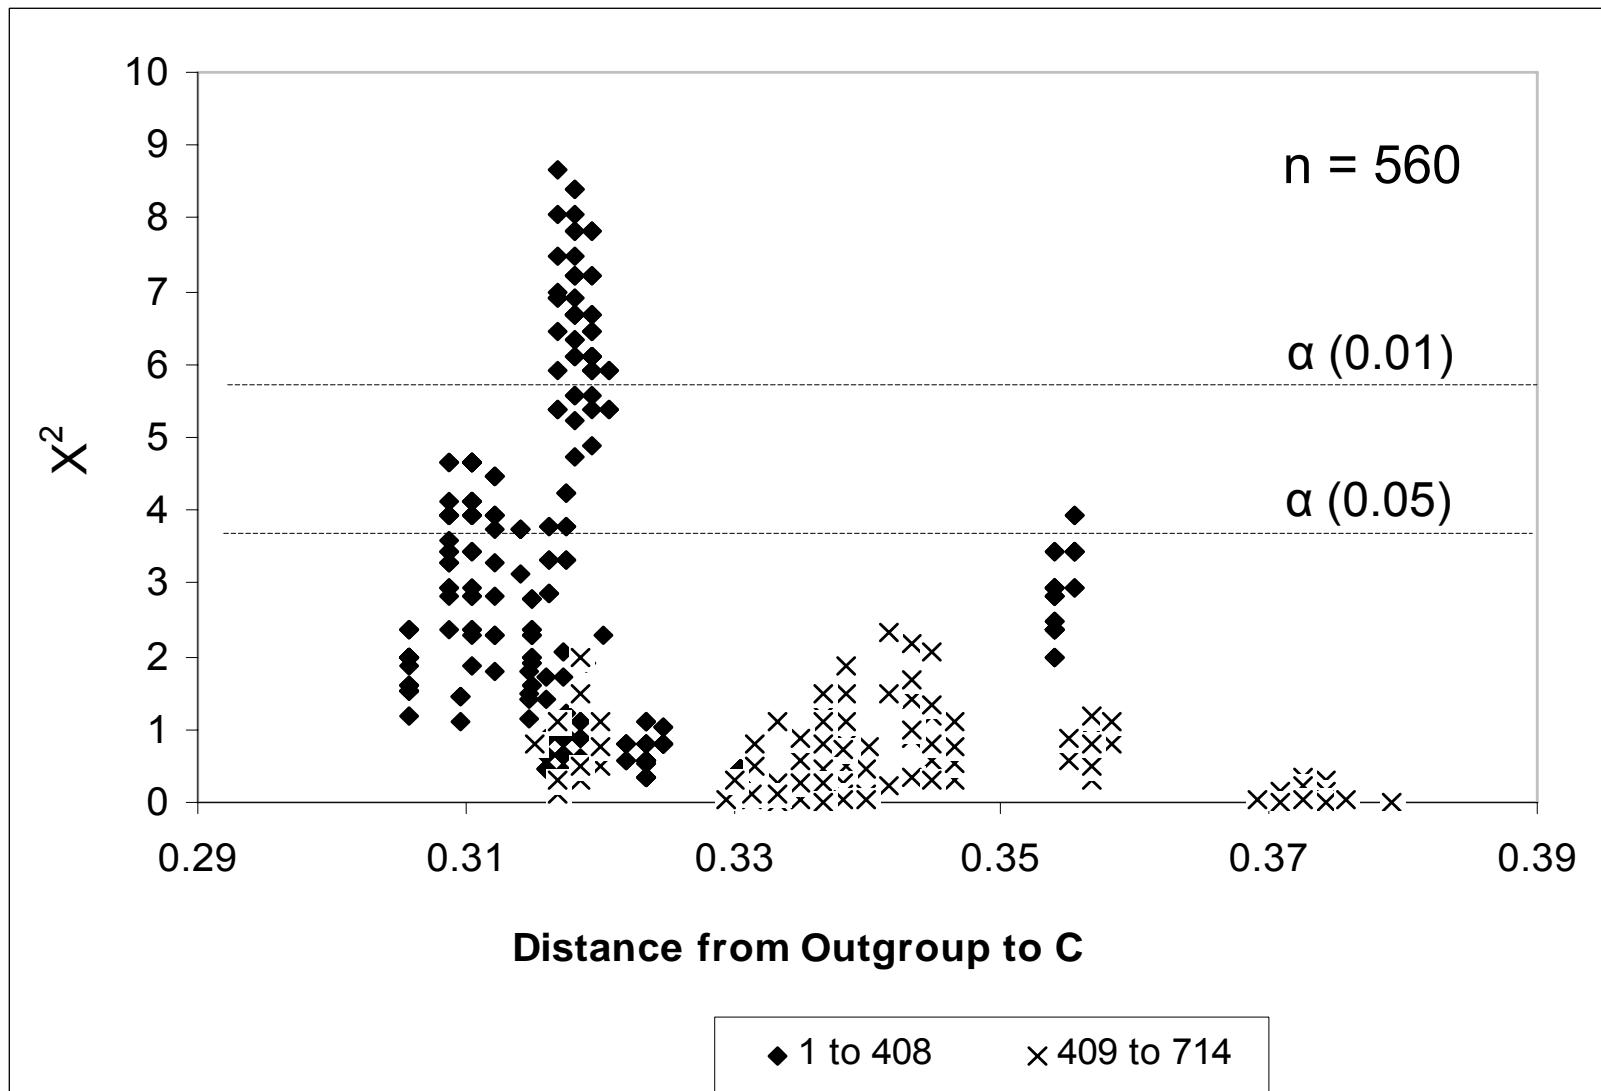

Figure 6

Supplement: 12862_2007_600_MOESM10_ESM.pdf [file 12862_2007_600_MOESM10_ESM.pdf]

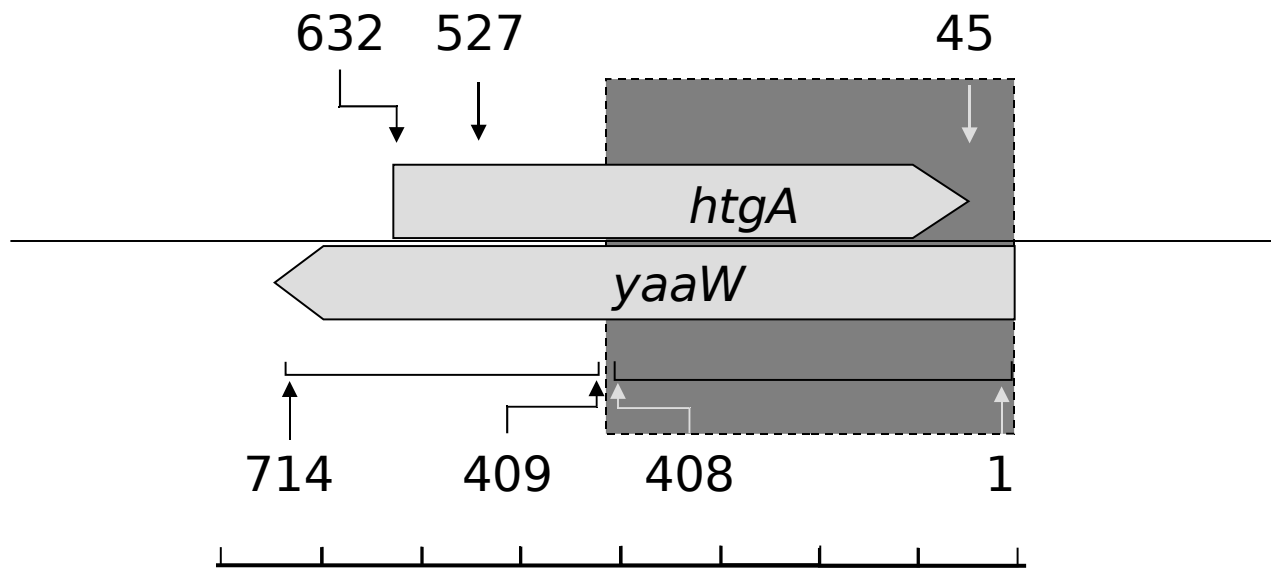

Supplement: 12862_2007_600_MOESM4_ESM.pdf [file 12862_2007_600_MOESM4_ESM.pdf]

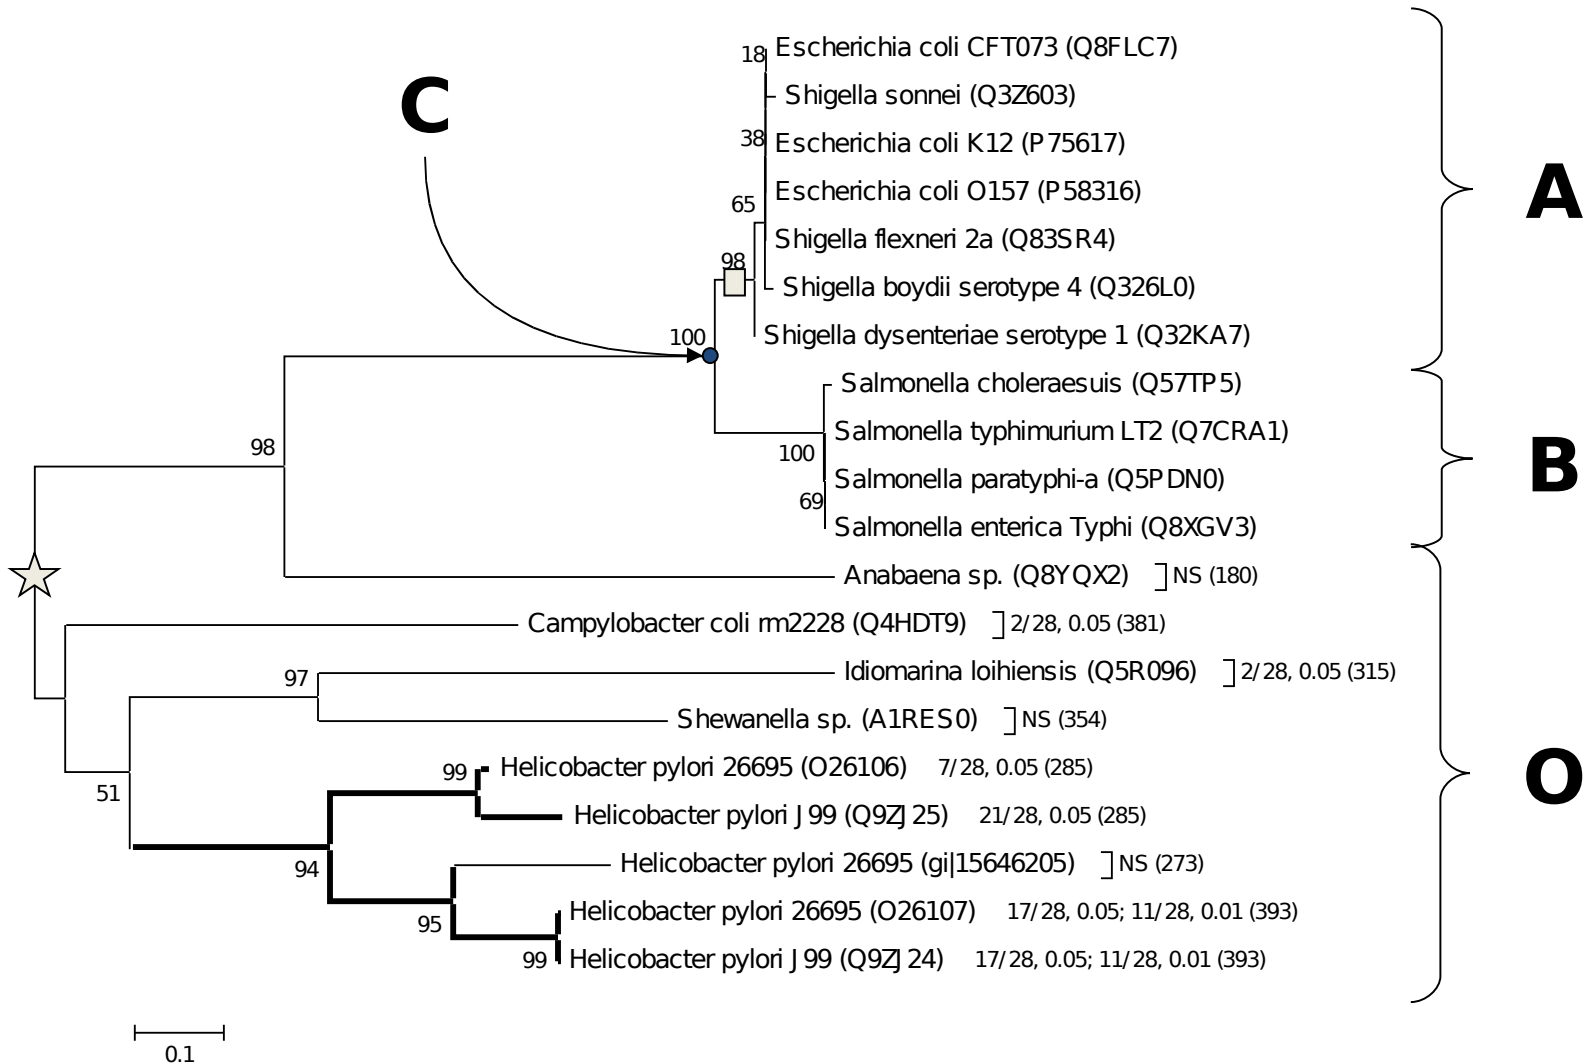

Supplement: 12862_2007_600_MOESM6_ESM.pdf [file 12862_2007_600_MOESM6_ESM.pdf]

**a**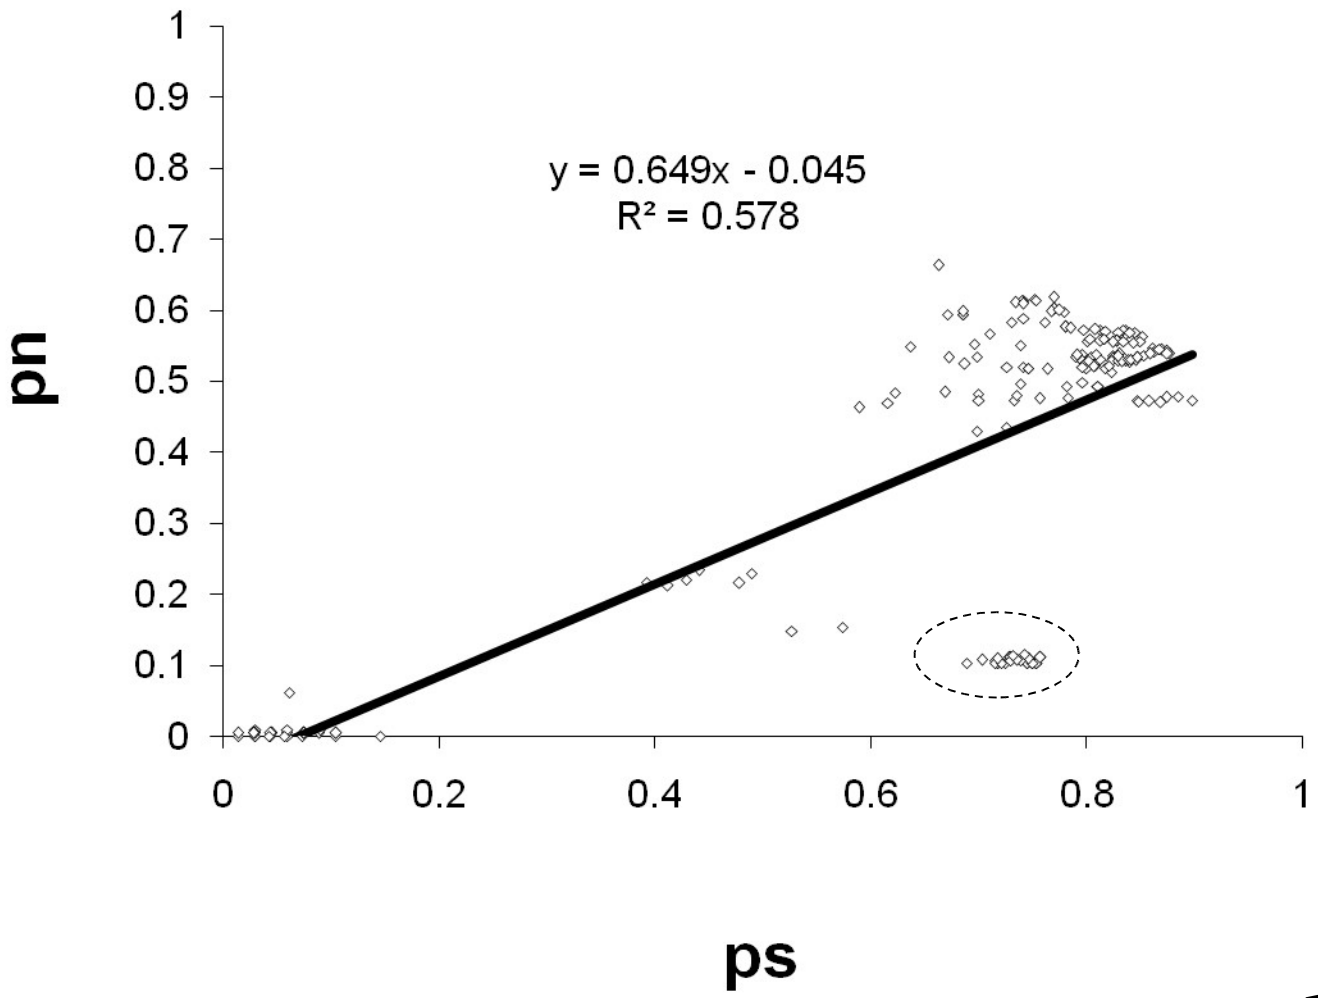 $n = 190$ **b**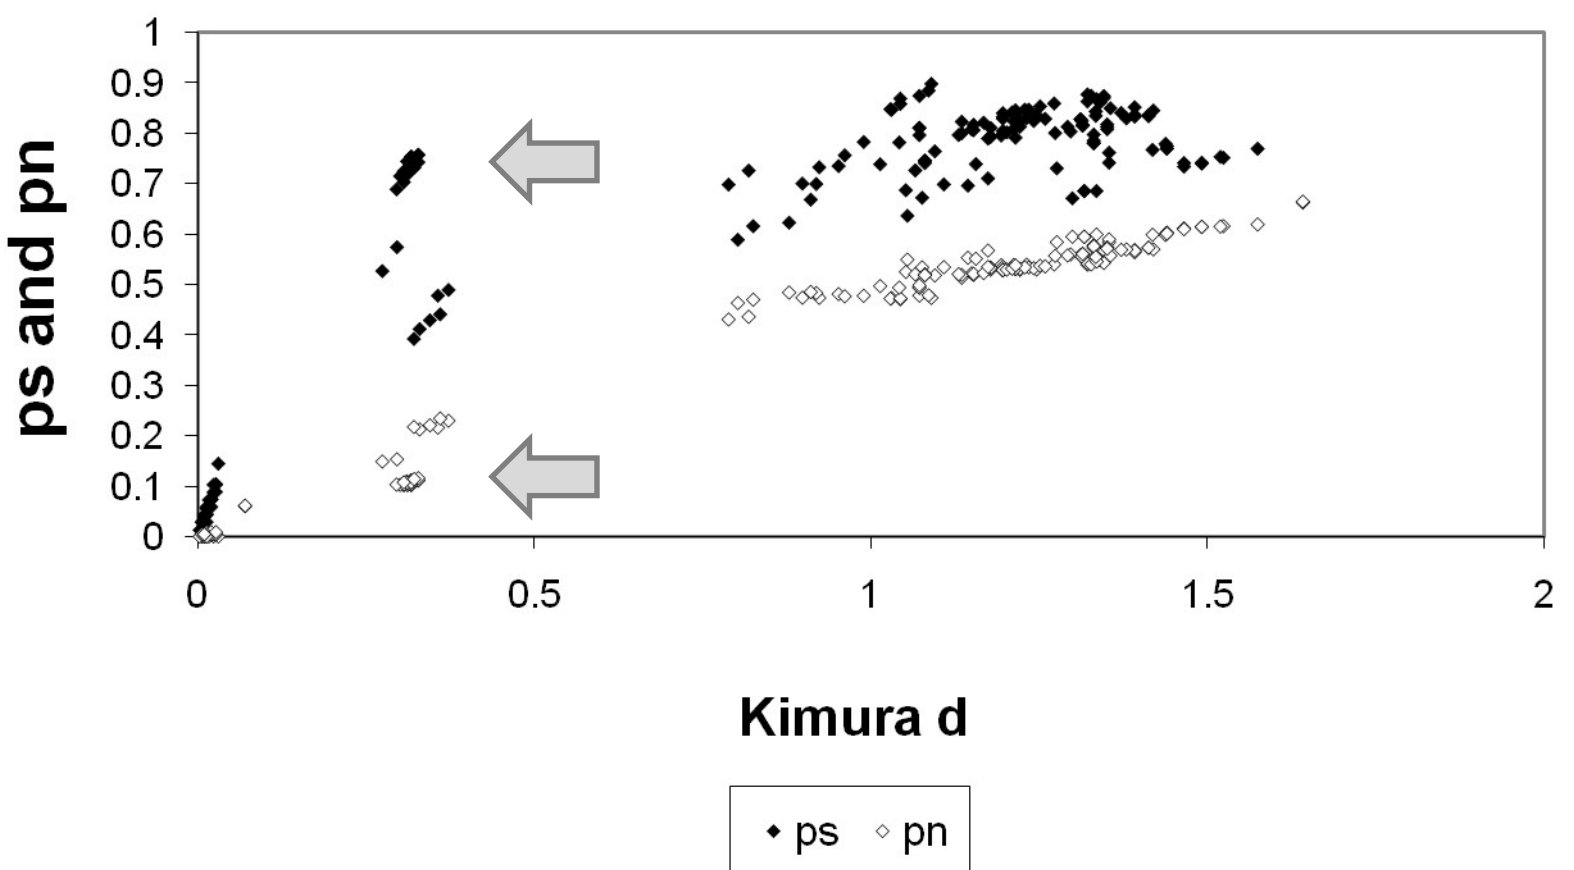 $n = 190$ **c**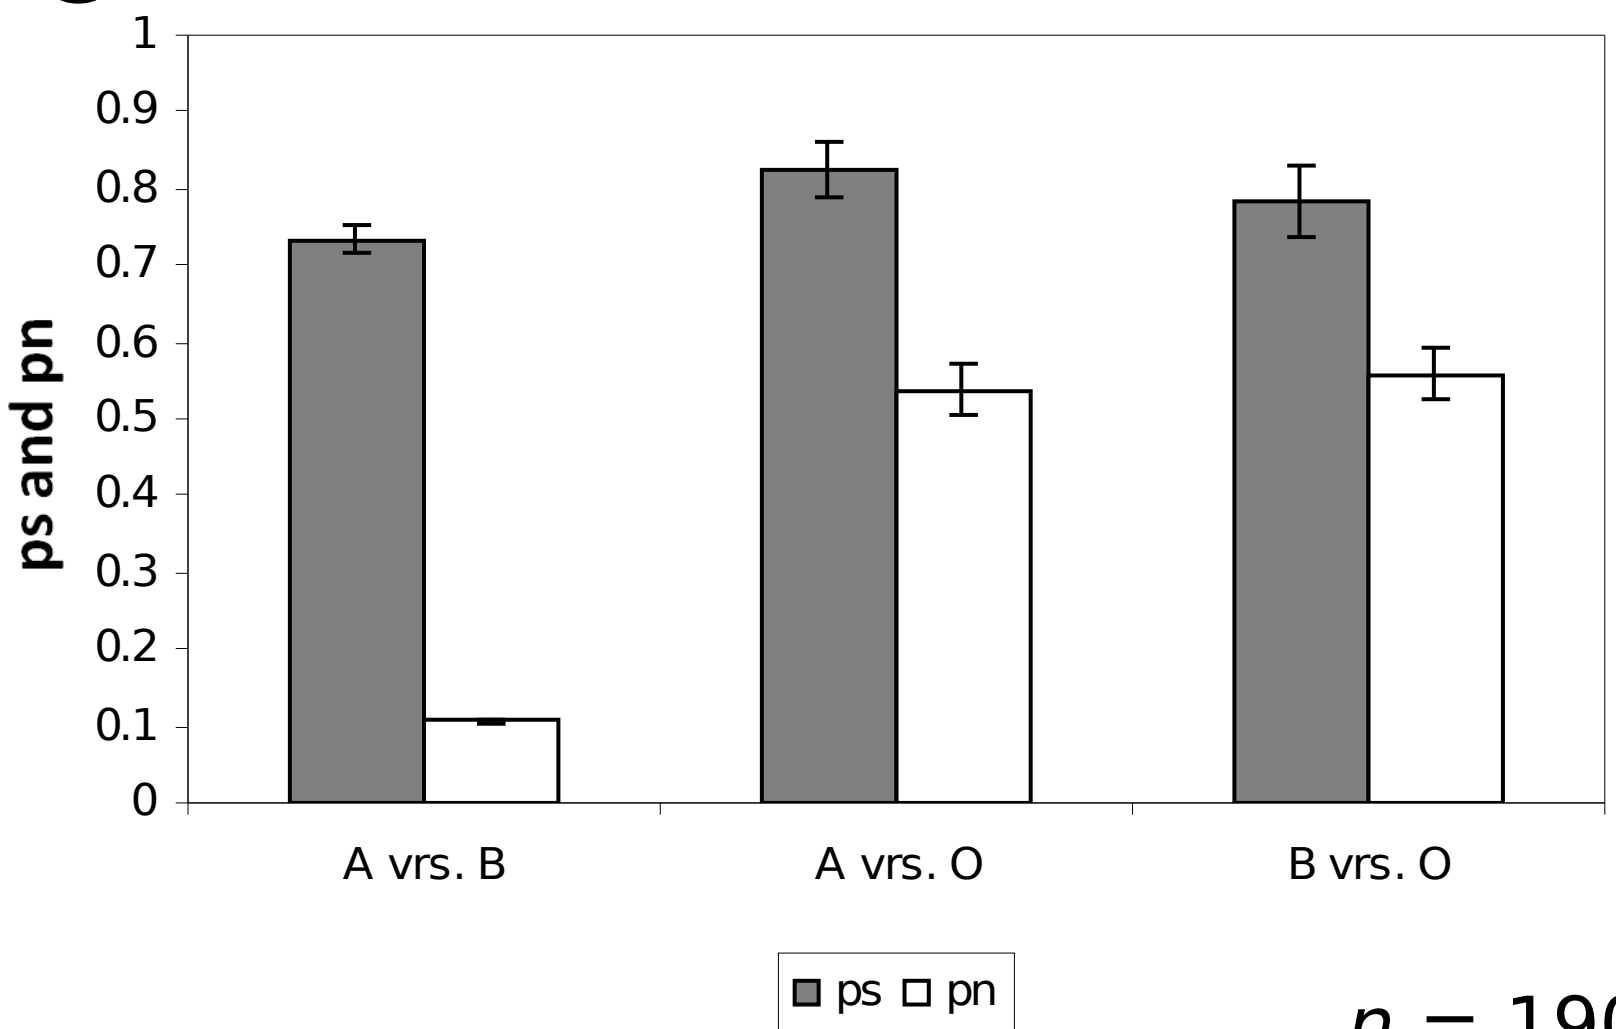 $n = 190$

Supplement: 12862_2007_600_MOESM7_ESM.pdf [file 12862_2007_600_MOESM7_ESM.pdf]

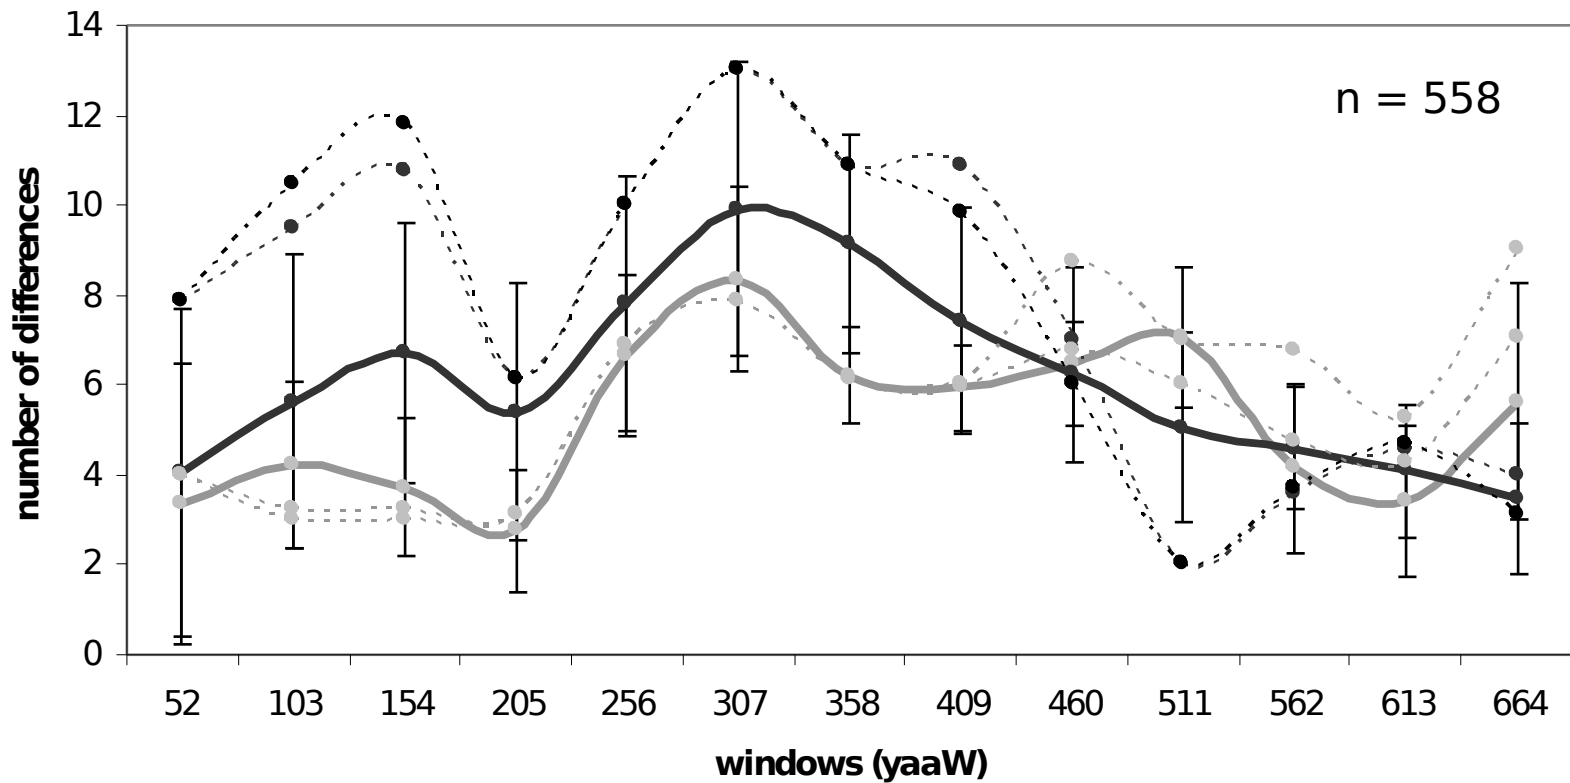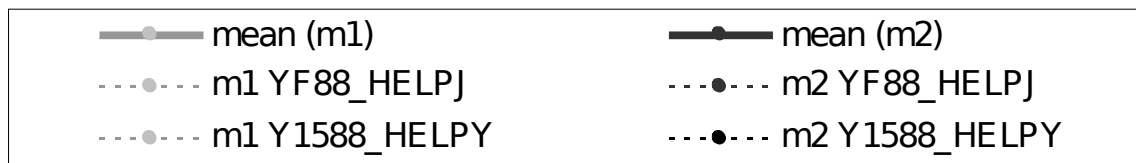

Supplement: 12862_2007_600_MOESM8_ESM.pdf [file 12862_2007_600_MOESM8_ESM.pdf]

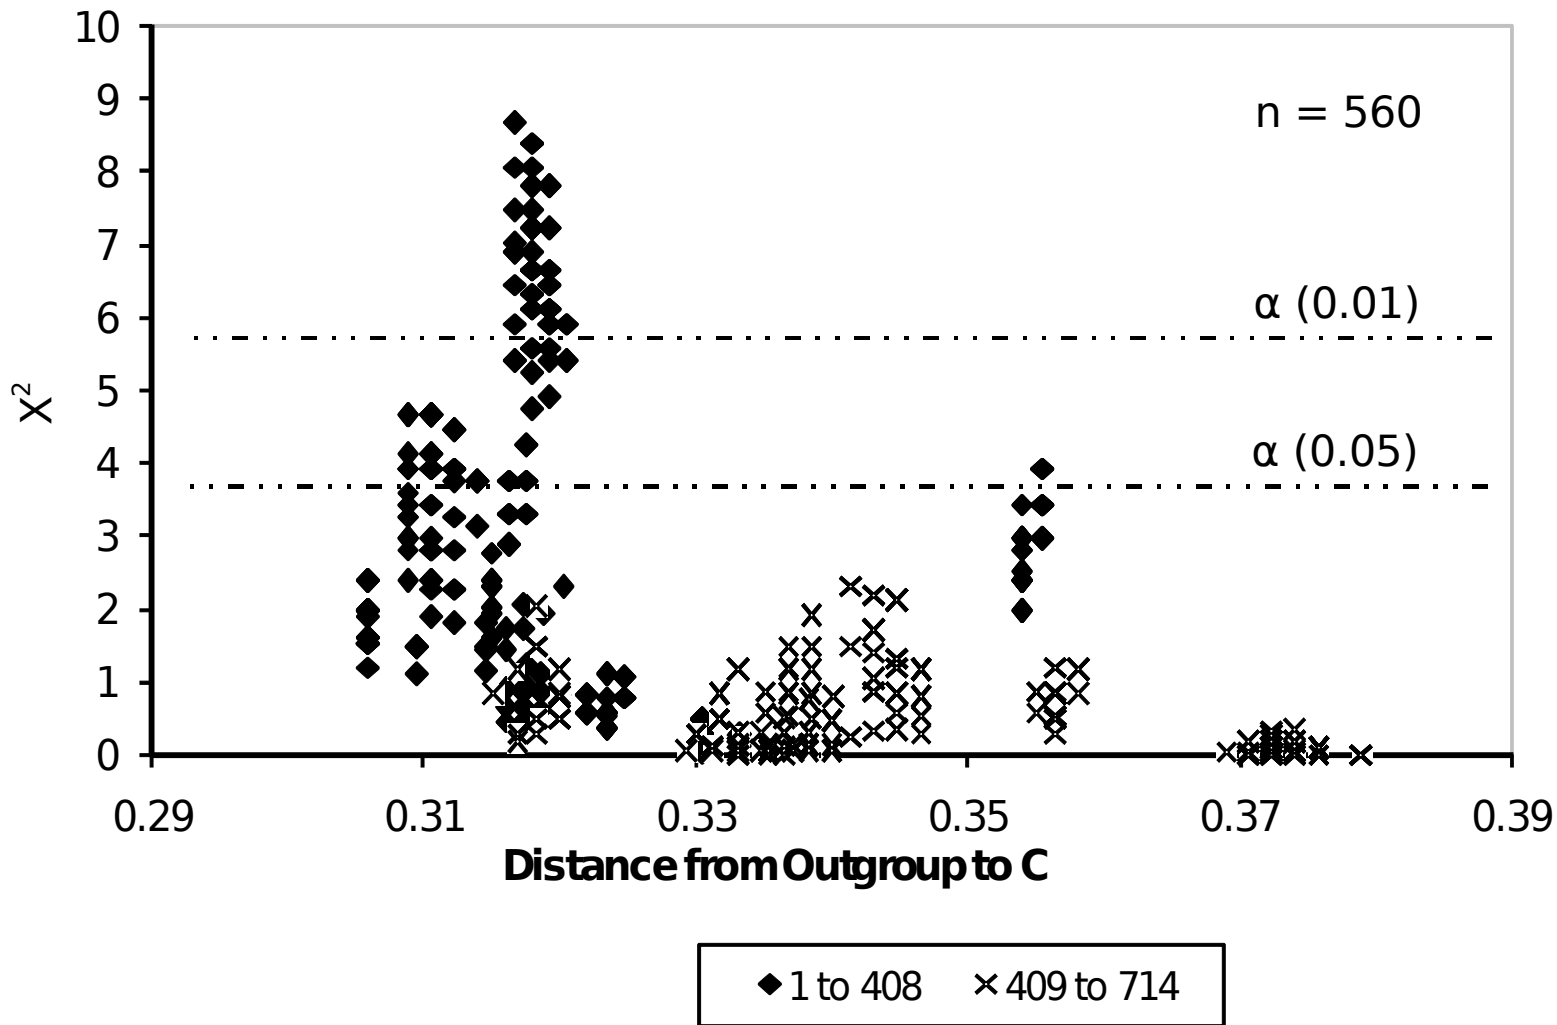

Supplement: 12862_2007_600_MOESM9_ESM.pdf [file 12862_2007_600_MOESM9_ESM.pdf]
